# Supplementary material for: Constructing Well-Defined and Robust Th-MOF-Supported Single-Site Copper for Production and Storage of Ammonia from Electroreduction of Nitrate
Source: PubMed Central journal article supplement — ACS Cent Sci. 2021 Jun 2;7(6):1066–72. doi: 10.1021/acscentsci.1c00370 (PMC8228586; doi:10.1021/acscentsci.1c00370), 2021-06-02
Supplement: oc1c00370_si_001.pdf [file oc1c00370_si_001.pdf]

# **Constructing Well-Defined and Robust Th-MOF-Supported Single-Site Copper for Production and Storage of Ammonia from Electroreduction of Nitrate**

Zhi Gao, Yulian Lai, Yuan Tao, Longhui Xiao, Liuxin Zhang and Feng Luo\*

State key Laboratory of Nuclear Resources and Environment, School of Biology, Chemistry and Material Science, East China University of Technology, Fuzhou, Jiangxi 344000, China. Email: ecitluofeng@163.com

## **Experimental Procedures**

**1.1. Synthesis of Th-BPYDC.** A mixture of 2,2'-bipyridine-5,5'-dicarboxylic acid (BPYDC; 0.05 mmol, 12.21 mg), Th(NO<sub>3</sub>)<sub>4</sub> (0.05 mmol, 24.00 mg), and ionic liquid of tetramethylguanidine chloride (0.05 mmol, 7.58 mg), nitric acid (150 μL) was added into 3 mL *N,N'*-dimethylformamide (DMF) in a screw-capped glass capped jar (10 mL), followed by heating at 120 °C for 72 h. After cooling down to room temperature, the resulting mixture was washed with DMF and colorless octahedral crystals were collected and dried in air.

**1.2. Synthesis of Cu@Th-BPYDC.** Firstly, 10 mg Th-BPYDC crystals was placed in a screw-capped glass capped jar (10 mL) containing 5 mL saturated CuCl<sub>2</sub> solution using acetonitrile as solvent. Then, the mixture was heated at 80 °C for 7 days, resulting in a color change of the crystals to green.

**1.3. Material Characterization.** Crystalline structure of Th-BPYDC and Cu@Th-BPYDC were collected at room temperature on a Bruker-AXS SMART

Breeze CCD diffractometer using graphite monochromated Cu K $\alpha$  radiation ( $\lambda = 1.54178 \text{ \AA}$ ). Powder X-ray diffraction (PXRD) analysis of all samples were taken on a Bruker AXSD8 Discover powder diffractometer with Cu K $\alpha$  radiation ( $k = 0.154 \text{ nm}$ ). Low temperature N<sub>2</sub> isotherms were recorded at 77 K on Micromeritics ASAP2020 instrument using ultrahigh-purity-grade (>99.999%) N<sub>2</sub>. Thermogravimetric analysis (TGA) was carried out over a TGA Q500 thermal analysis system under air atmosphere. The Cu content of Cu@Th-BPYDC was determined by Shimadzu ICPS-7500 inductively coupled plasma emission spectrometer (ICP-AES). Temperature programmed desorption of NH<sub>3</sub> (NH<sub>3</sub>-TPD) measurements were carried out on the AutoChem II. 2920 instrument (Micromeritics, USA).

**1.4. Electrochemical measurements.** Electrochemical measurements were performed on a CHI 660D electrochemical workstation (Chenhua, Shanghai) using a typical H-type electrolytic cell separated by a membrane in a strand three-electrode system. The catalyst inks were prepared by adding 3 mg catalyst into 1 mL solution including 0.95 mL ethyl alcohol and 50  $\mu\text{L}$  Nafion solution, followed by ultrasonication for 30 min. Finally, 50  $\mu\text{L}$  of above ink was dripped on the carbon paper ( $1 \times 1 \text{ cm}^2$ ) and then dried at room temperature. Carbon electrode, saturated calomel electrode and the as-prepared catalyst were used as counter electrode, reference electrode and working electrode, respectively. Before nitrate electroreduction measurement, the cathode electrolyte was purged with Ar (99.99% purity) for 30 min. The linear sweep voltammetry (LSV) was conducted in at a scan rate of  $5 \text{ mV s}^{-1}$  to obtain the polarization curves. The potentiostatic test was

conducted at different potentials for 2 h. The electrochemically active surface area (ECSA) of different catalysts was determined based on the double-layer capacitance ( $C_{dl}$ ) using a simple cyclic voltammetry method in a non-Faradic potential range of 1.023-1.123 V vs RHE. By plotting the capacitive density at 1.073 V vs RHE against the scan rate (10, 20, 40, 60, 80 and 100 mV s<sup>-1</sup>), a linear trend was observed. The slope of the fitted line was the twice of  $C_{dl}$ . The current density normalized to the electrochemically active surface area (ECSA) was calculated according to the equation of  $J_{ECSA} = I/S_{ECSA}$ , where  $J_{ECSA}$  = current density normalized by ECSA;  $I$  = current density (mA);  $S_{ECSA} = C_{dl}/C_s$  ( $C_{dl}$  = double layer capacitance,  $C_s = 29 \mu\text{F cm}^{-2}$ ). Electrochemical impedance spectroscopy (EIS) measurements were carried out over a frequency range from 100 kHz to 0.1 Hz at the at the potential of 0 V vs RHE.

**1.5. NH<sub>3</sub> detection.** The concentration of NH<sub>3</sub> product was detected by a colorimetric method using Nessler's reagent. Owing to the large concentration of NH<sub>3</sub> products, the obtained reaction solutions were diluted to appropriate concentration to match the range of calibration curves.

**1.6. Computational formula.** The Faradaic efficiency of electroreduction of NO<sub>3</sub><sup>-</sup> to NH<sub>3</sub> was calculated following the equation of Faradaic efficiency =  $(8F \times c \times V)/(M \times Q)$ , where  $F$  is the Faraday constant (96485 C/mol),  $c$  is the measured NH<sub>3</sub> concentration,  $V$  is the volume of the electrolyte,  $M$  is the relative molecular mass and  $Q$  is the total charge used for electrosynthesis. The amount of NH<sub>3</sub> produced at a specific time was calculated using the  $n = (c \times V)$ .

**1.7. <sup>15</sup>NO<sub>3</sub><sup>-</sup> isotopic labelling tracer experiment.** <sup>15</sup>NO<sub>3</sub><sup>-</sup> (99 atom%) with the

concentration of 100 mM was used as the feeding N-source to perform the isotopic labeling nitrate reduction experiments to clarify the source of ammonia.

**1.8. NH<sub>3</sub> sorption measurements.** Isotherm of NH<sub>3</sub> at 298 K was collected on Micromeritics ASAP2020 instrument. Prior to the NH<sub>3</sub> adsorption measurements, samples were activated by heating at 100 °C overnight under high vacuum.

**1.9. Static NH<sub>3</sub> vapor sorption.** Typically, the activated Cu@Th-BPYDC (20 mg) was placed in a small vial (1.5 mL). Then the vial packed Cu@Th-BPYDC was placed in a large wide-mouth bottle (100 mL) containing electrolyte after stability test. The large bottle was sealed and kept in a heated oven at 50 °C. After a certain contact time, the large bottle was taken out and cooled to room temperature. The weight of the small vial containing the Cu@Th-BPYDC sample was then measured. This procedure was terminated once the weight of the Cu@Th-BPYDC did not change. For comparison, the uptake ability of Cu@Th-BPYDC toward pure H<sub>2</sub>O was also measured by the same procedure.

**1.10. DFT theoretical calculation.** The structures were optimized at the method of CAM-B3LYP<sup>1-4</sup> level of theory using Gaussian 16 program package,<sup>5</sup> where the metal element Cu was using the pseudopotential basis set exchange dgauss-a2-dftxfit,<sup>6,7</sup> the others were using the all electron basis set 6-311++G(d,p). For each stationary points, further frequency calculations were performed to ensure there were no imaginary frequencies at same method and basis set. The binding energy  $\Delta E_{bind}$  for ligand adsorbing NH<sub>3</sub> was calculated by Eq. 1, and then, with the addition of metals Cu, the adsorption energy was calculated by Eq. 2,

$$\Delta E_{bind} = E_{ligand-NH_3} - E_{ligand} - E_{NH_3} \quad (1)$$

$$\Delta E_{bind} = E_{ligand-Cu-NH_3} - E_{ligand-Cu} - E_{NH_3} \quad (2)$$

where  $E_{ligand-Cu-NH_3}$  and  $E_{ligand-NH_3}$  are the total energy of adsorbed structures;  $E_{ligand}$  and  $E_{ligand-Cu}$  are the total energies of single ligand;  $E_{NH_3}$  is the energy of  $NH_3$ .

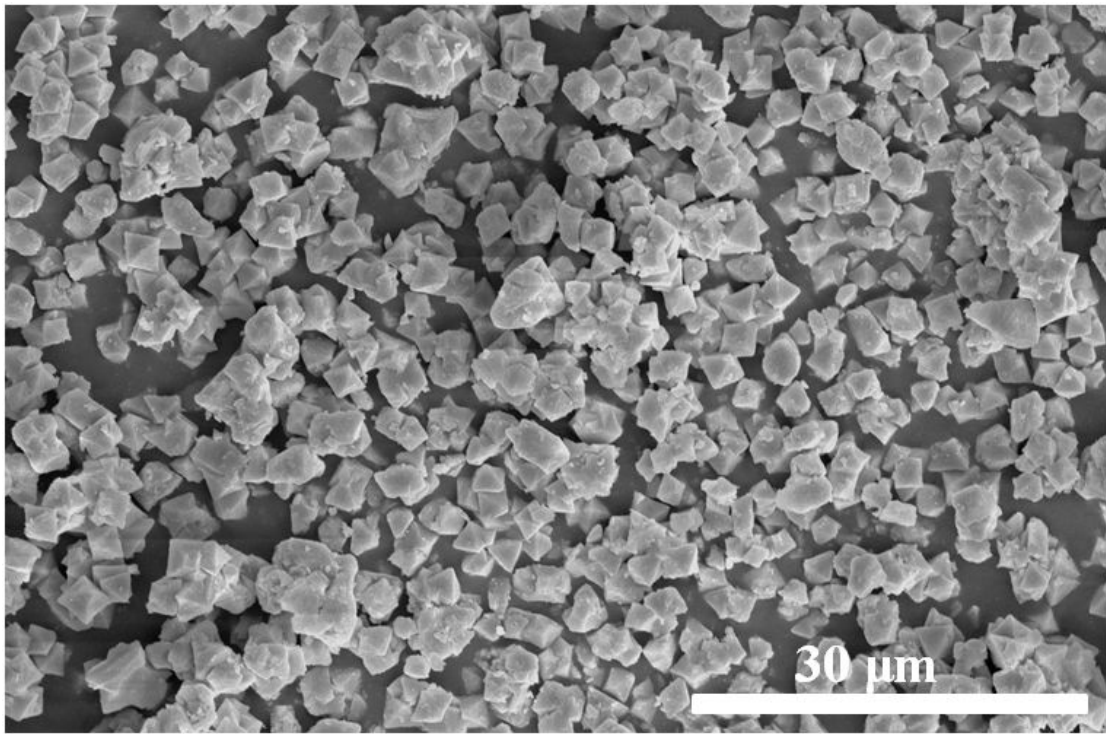

**Figure S1.** SEM image of Cu@Th-BPYDC.

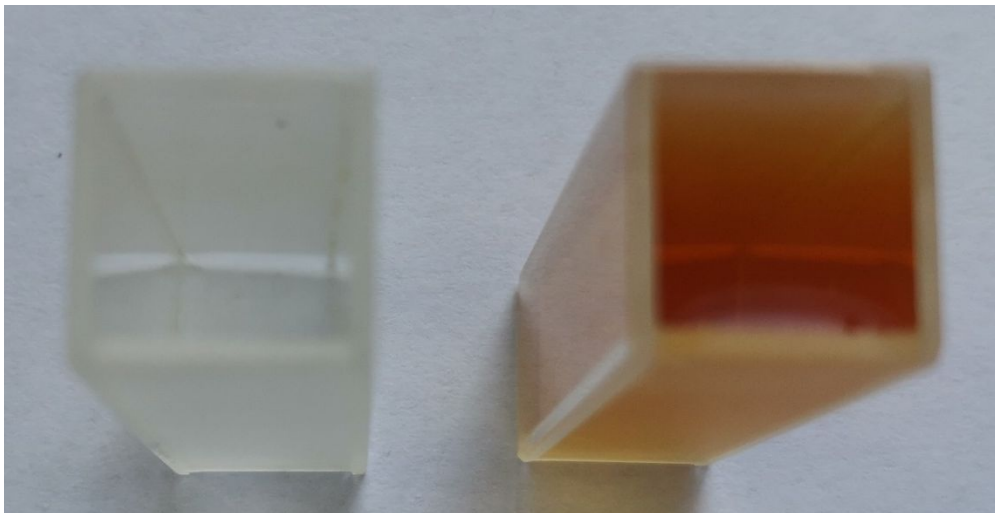

**Figure S2.** The chromogenic results of the electrolyte obtained after reaction without (left) and with (right)  $\text{KNO}_3$  tested by Nessler's reagents.

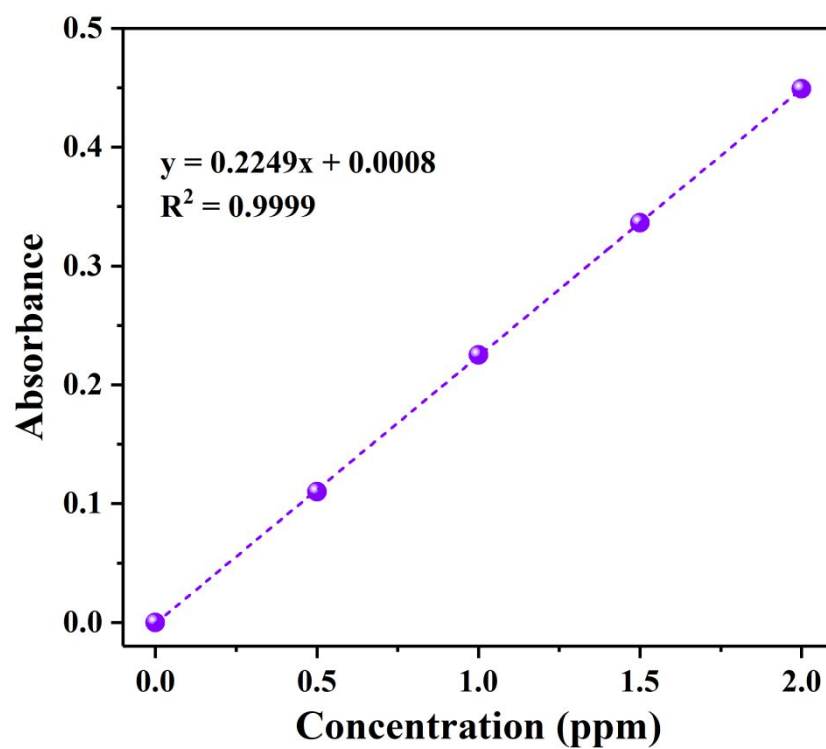

**Figure S3.** The linear standard curve for the calculation of  $\text{NH}_3$  production.

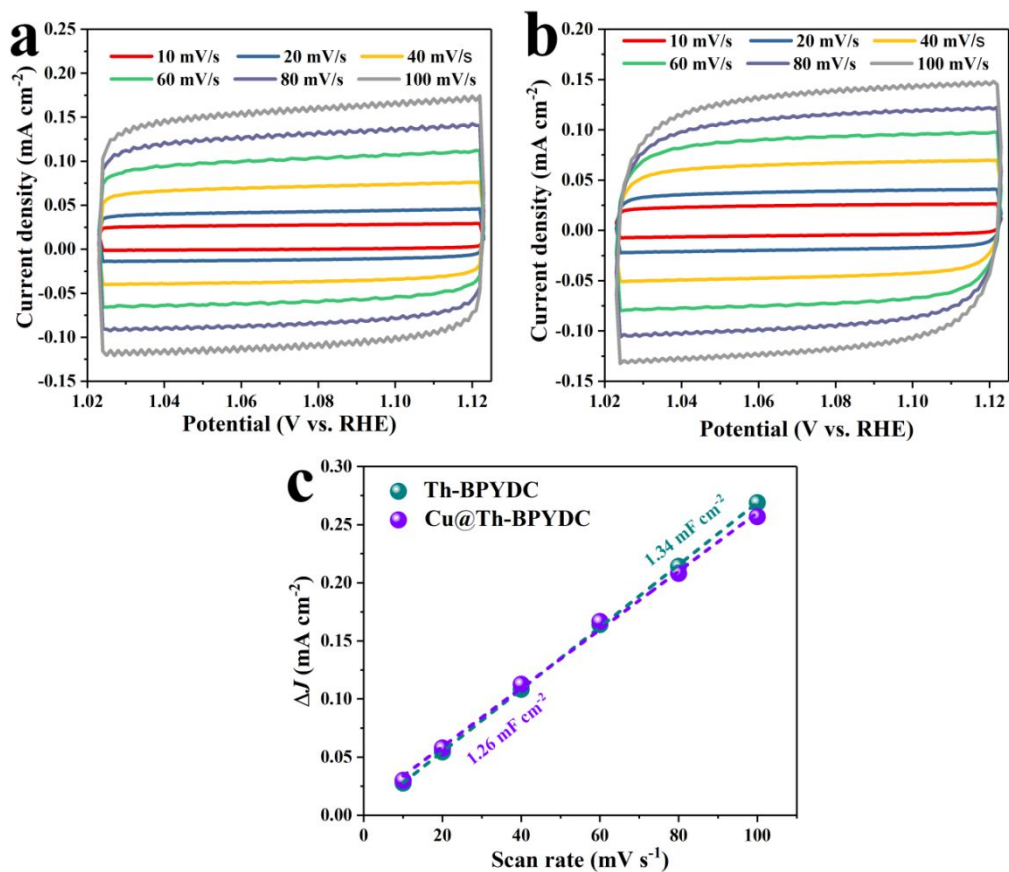

**Figure S4.** CV plots of Th-BPYDC (a) and Cu@Th-BPYDC (b) tested at various scan rates from 10 to 100 mV s<sup>-1</sup>; ECSA evaluation (c).

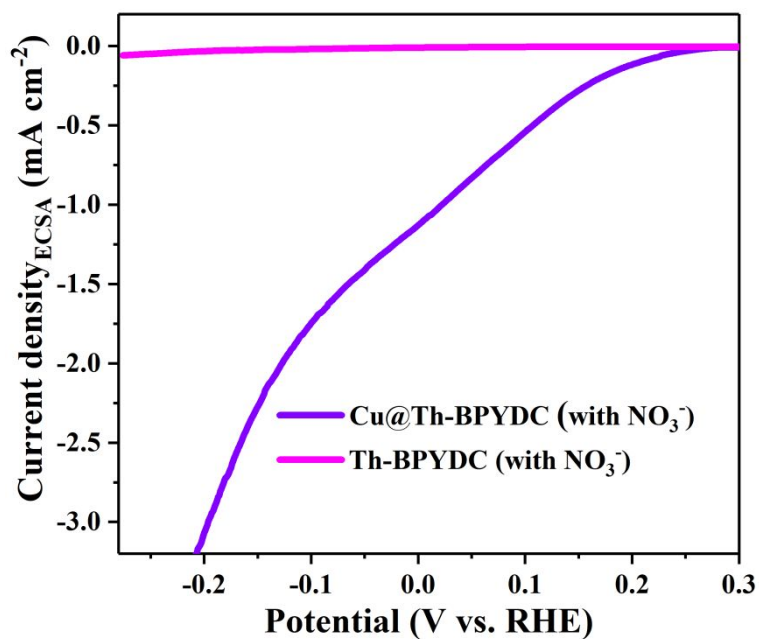

**Figure S5.** ECSA-normalized current densities.

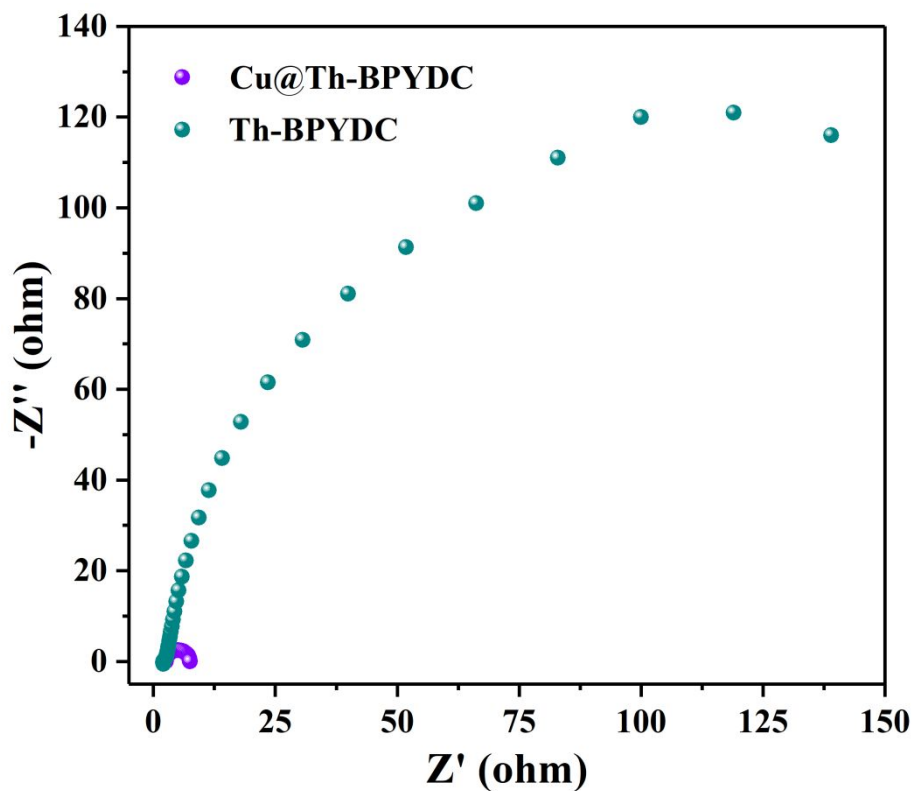

**Figure S6.** Nyquist plots measured at the potential of 0 V vs RHE.

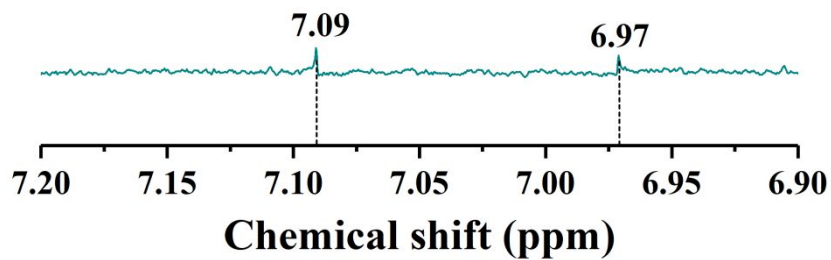

**Figure S7.**  $^1\text{H}$  NMR spectrum using  $^{15}\text{NO}_3^-$  as nitrogen source.



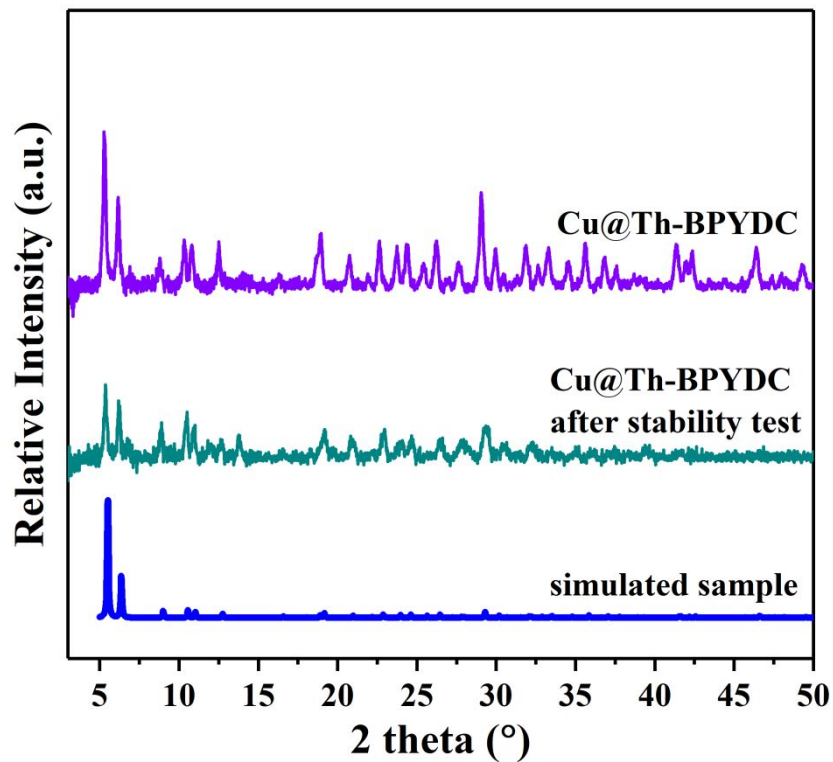

**Figure S8.** XRD patterns of Cu@Th-BPYDC before and after 1000 CV cycles.

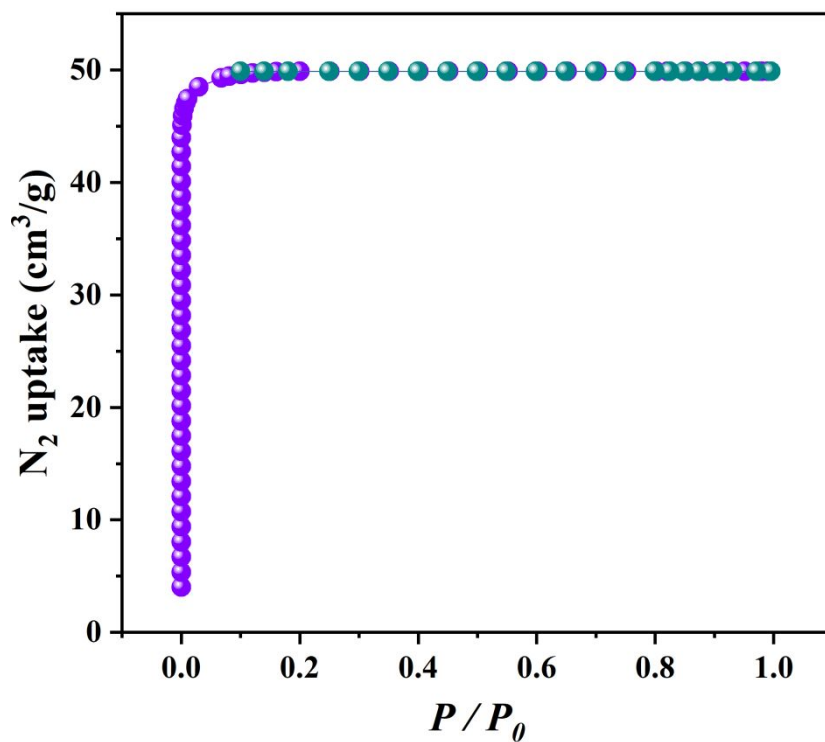

**Figure S9.** The N<sub>2</sub> adsorption of Cu@Th-BPYDC after stability test for NO<sub>3</sub><sup>-</sup> electroreduction at 77 K.

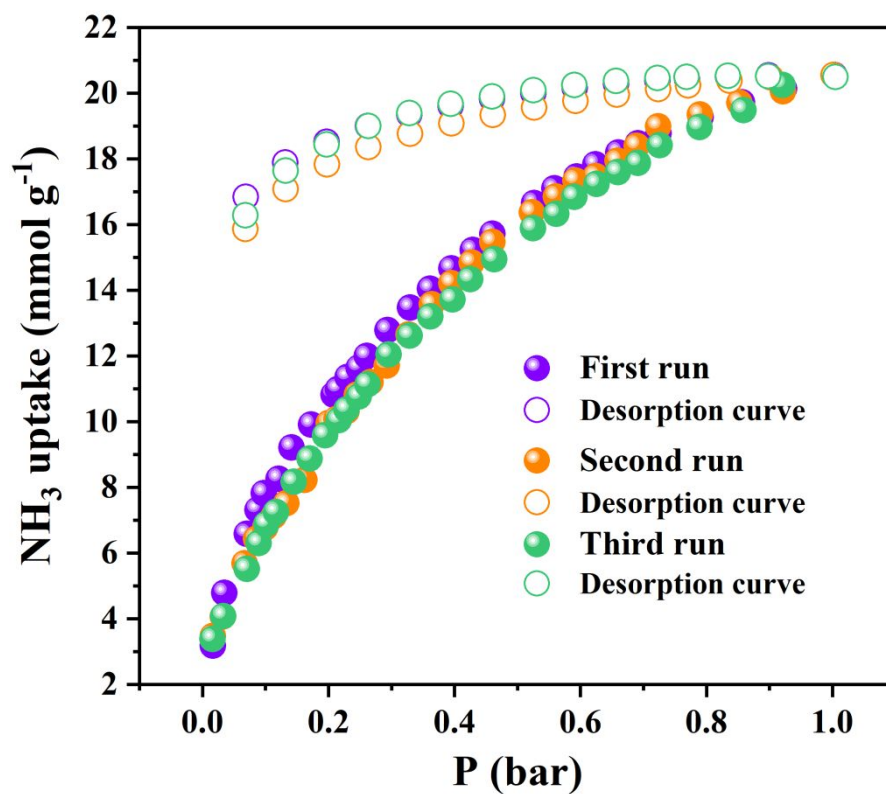

Figure S10. The reusability of Cu@Th-BPYDC toward NH<sub>3</sub> uptake.

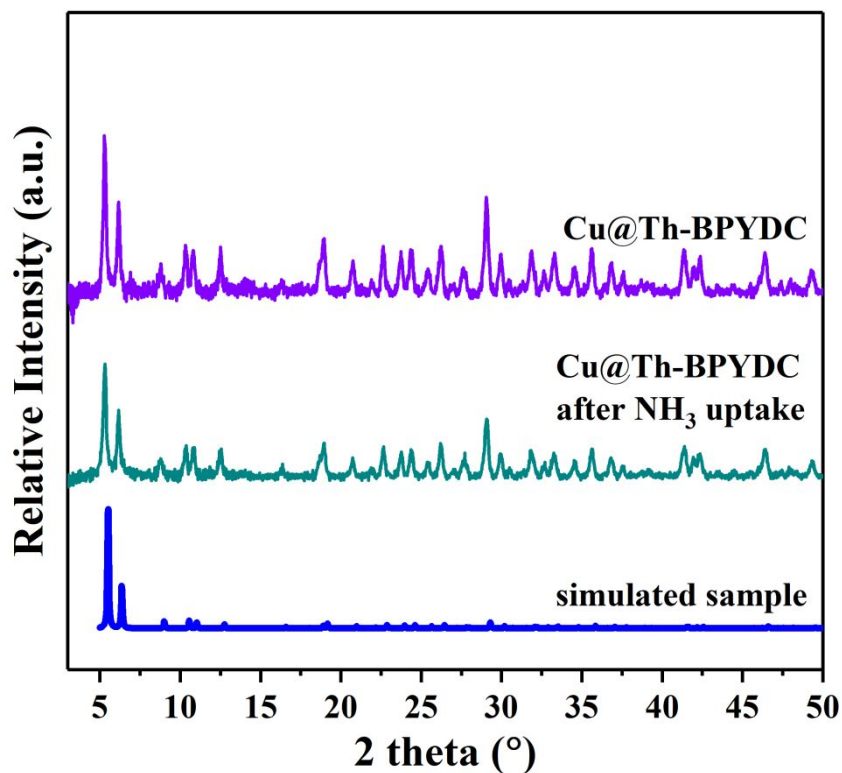

Figure S11. XRD patterns of Cu@Th-BPYDC before and after NH<sub>3</sub> uptake.

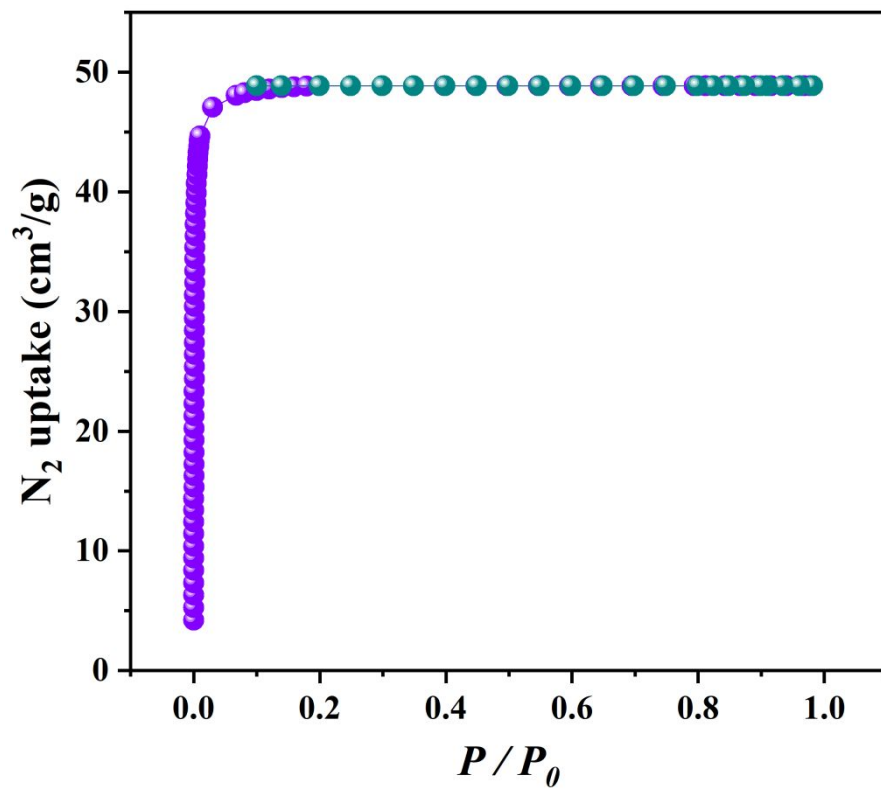

**Figure S12.** The N<sub>2</sub> adsorption of Cu@Th-BPYDC after NH<sub>3</sub> uptake at 77 K.

**Table S1.** The comparison of the NH<sub>3</sub> synthesis activity of Cu@Th-BPYDC in NO<sub>3</sub><sup>-</sup> electroreduction with other catalysts under ambient conditions.

| Catalyst                             | System                                                         | Conditions            | NH <sub>3</sub> Yield rate                                  | Faradaic efficiency | Ref.                                           |
|--------------------------------------|----------------------------------------------------------------|-----------------------|-------------------------------------------------------------|---------------------|------------------------------------------------|
| Cu@Th-BPYDC                          | 1 M KOH +<br>100 mM KNO <sub>3</sub>                           | Ambient<br>conditions | 225.3 μmol h <sup>-1</sup><br>cm <sup>-2</sup>              | 92.5 %              | <a href="#">This work</a>                      |
| PTCDA/O-Cu                           | 0.1 M PBS<br>NO <sub>3</sub> <sup>-</sup> reduction            | Ambient<br>conditions | 436±85 μg h <sup>-1</sup><br>cm <sup>-2</sup>               | 77±3%               | Nat. Energy 2020, 5,<br>605–613                |
| Co/CoO NSAs                          | 0.1 M Na <sub>2</sub> SO <sub>4</sub> ,<br>NaNO <sub>3</sub>   | Ambient<br>conditions | 194.46 μmol h <sup>-1</sup><br>cm <sup>-2</sup>             | 93.8 %              | Sci. China. Chem.<br>2020, 63, 1469–1476       |
| B <sub>4</sub> C nanosheet           | 0.1 M HCl                                                      | Ambient<br>conditions | 0.16 μmol h <sup>-1</sup> cm <sup>-2</sup>                  | 15.95 %             | Nat. Commun. 2018,<br>9, 3485                  |
| BiNCs                                | K <sub>2</sub> SO <sub>4</sub> /H <sub>2</sub> SO <sub>4</sub> | Ambient<br>conditions | 52 μmol h <sup>-1</sup><br>cm <sup>-2</sup>                 | 66 %                | Nat. Catal. 2019, 2,<br>448-456                |
| Au <sub>6</sub> /Ni<br>Nanoparticles | 0.05 M H <sub>2</sub> SO <sub>4</sub>                          | Ambient<br>conditions | 0.87 μmol h <sup>-1</sup> cm <sup>-2</sup>                  | 67.8 %              | J. Am. Chem. Soc.<br>2019, 141,<br>14976-14980 |
| Mo <sup>0</sup> /GDY                 | 0.1 M Na <sub>2</sub> SO <sub>4</sub>                          | Ambient<br>conditions | 145.4 μg h <sup>-1</sup><br>mg <sub>cat</sub> <sup>-1</sup> | 21 %                | J. Am. Chem. Soc.<br>2019, 141,<br>10677-10683 |

**Table S2.** Static NH<sub>3</sub> capacities of reported MOFs adsorbents at 298 K and 1 bar.

| adsorbents                                   | NH <sub>3</sub> capacity (mmol g <sup>-1</sup> ) | Ref.                                               |
|----------------------------------------------|--------------------------------------------------|----------------------------------------------------|
| Cu@Th-BPYDC                                  | 20.55                                            | <a href="#">This work</a>                          |
| Mg <sub>2</sub> (dobpdc)                     | 23.90                                            | Angew. Chem. Int. Ed. 2020, 132, 22720-22725       |
| Cu <sub>2</sub> Cl <sub>2</sub> BBTA         | 19.79                                            | J. Am. Chem. Soc. 2018, 140, 3461-3466.            |
| Co <sub>2</sub> Cl <sub>2</sub> BBTA         | 17.95                                            | J. Am. Chem. Soc. 2018, 140, 3461-3466.            |
| 3D-[Zn <sub>2</sub> (L1) <sub>2</sub> (bpe)] | 17.8                                             | ACS Appl. Mater. Interfaces 2017, 9, 37419- 37434. |
| Fe-MIL-101-SO <sub>3</sub> H                 | 17.80                                            | Chem. Sci. 2017, 8, 4399-4409                      |
| Mg-MOF-74                                    | ~16.2                                            | Chem. Eur. J. 2014, 20, 15611-15617.               |
| P1-PO <sub>3</sub> H <sub>2</sub>            | 18.7                                             | Chem. Sci. 2017, 8, 4399-4409.                     |
| COF-10                                       | 15                                               | Nat. Chem. 2010, 2, 235-238.                       |
| [SrOOC] <sub>17</sub> -COF                   | 14.30                                            | ACS Cent. Sci. 2018, 4, 748-754.                   |

## References

1. Yanai, T.; Tew, D.; Handy, N. A new hybrid exchange-correlation functional using the Coulomb-attenuating method (CAM-B3LYP). *Chem. Phys. Lett.* **2004**, *393*, 51-57.
2. Becke, A. D. Density-functional thermochemistry. III. The role of exact exchange. *J. Chem. Phys.* **1993**, *98*, 5648-5652.
3. Miehlich, B.; Savin, A.; Stoll, H.; Preuss, H. Results obtained with the correlation-energy density functionals of Becke and Lee, Yang and Parr. *Chem. Phys. Lett.* **1989**, *157*, 200-206.
4. Less, C.; Yang, W.; Parr, R. G. Development of the Colle-Salvetti correlation-energy formula into a functional for the electron density. *Phys. Rev. B* **1988**, *37*, 785-789.
5. Frisch, M. J.; Trucks, G. W.; Schlegel, H. B.; Scuseria, G. E.; Robb, M. A.; Cheeseman, J. R.; Zakrzewski, V. G.; Montgomery, J. A.; Stratmann, J. R. E.; Burant, J. C.; Dapprich, S.; Millam, J. M.; Daniels, A. D.; Kudin, K. N.; Strain, M. C.; Farkas, O.; Tomasi, J.; Barone, V.; Cossi, M.; Cammi, R.; Mennucci, B.; Pomelli, C.; Adamo, C.; Clifford, S.; Ochterski, J.; Petersson, G. A.; Ayala, P. Y.; Cui, Q.; Morokuma, K.; Salvador, P.; Dannenberg, J. J.; Malick, D. K.; Rabuck, A. D.; Raghavachari, K.; Ortiz, J. V.; Baboul, A. G.; Stefanov, B. B.; Liu, G.; Liashenko, A.; Piskorz, P.; Komaromi, I.; Gomperts, R.; Martin, R. L.; Fox, D. J.; Keith, T.; Al-Laham, M. A.; Peng, C. Y.; Nanayakkara, A.; Challacombe, M.; Gill, P. M. W.; Johnson, B.; Chen, W.; Wong, M. W.; Andres, J. L.; Gonzalez, C.; Head-Gordon, M.; Replogle, E. S.; Pople, J. A. *Gaussian 16*, A. 03; Gaussian, Inc.: Wallingford, CT, 2016.
6. Schuchardt, K. L.; Didier, B. T.; Elsethagen, T.; Sun, L.; Gurumoorthi, V.; Chase, J.; Li, J.; Windus, T. L. Basis Set Exchange: A Community Database for Computational Sciences. *J. Chem. Inf. Model.* **2007**, *47*, 1045-1052.
7. Feller, D., J. The Role of Databases in Support of Computational Chemistry Calculations. *J. Comp. Chem.* **1996**, *17*, 1571-1586.
